# Supplementary material for: Population-Specific Plant-To-Plant Signaling in Wild Lima Bean
Source: MDPI journal article supplement (doi:10.3390/plants11182320), 2022-09-06
Supplement: s1 [file s1]

Supplemental material.

Table S1. Emissions (ng/6 hours/ plant) and unique retention times for all compound for the three damage treatments, including the undamaged control, for all three *Phaseolus lunatus* populations.

| Compound                       | Retention time | Flores       |                   |                  | Inka          |                   |                  | Yel          |                   |                  |
|--------------------------------|----------------|--------------|-------------------|------------------|---------------|-------------------|------------------|--------------|-------------------|------------------|
|                                |                | Control      | Mechanical damage | Herbivore damage | Control       | Mechanical damage | Herbivore damage | Control      | Mechanical damage | Herbivore damage |
| Z-3-hexenal                    | 5.2            | 0.85 ± 0.85  | 1.82 ± 1.44       | 3.43 ± 1.34      | 0.00 ± 0.00   | 4.22 ± 1.95       | 4.55 ± 2.01      | 0.00 ± 0.00  | 3.28 ± 2.35       | 5.56 ± 2.21      |
| 2,4-dimethyl-heptane           | 5.7            | 2.99 ± 0.69  | 7.28 ± 1.53       | 3.44 ± 1.13      | 2.46 ± 0.76   | 3.93 ± 1.06       | 5.17 ± 1.22      | 5.57 ± 1.16  | 4.65 ± 1.21       | 4.62 ± 1.03      |
| 4-hydroxy-4-methyl-2-pentanone | 6.2            | 1.38 ± 0.68  | 2.04 ± 0.63       | 1.42 ± 0.77      | 0.44 ± 0.36   | 1.56 ± 0.18       | 2.54 ± 1.93      | 1.24 ± 0.33  | 1.53 ± 0.56       | 2.65 ± 0.73      |
| Z-3-hexen-1-ol                 | 6.4            | 0.06 ± 0.06  | 5.72 ± 1.09       | 9.88 ± 1.81      | 0.56 ± 0.39   | 14.76 ± 3.26      | 21.11 ± 3.76     | 0.15 ± 0.15  | 12.73 ± 6.52      | 6.16 ± 2.00      |
| E-2-hexenal                    | 6.5            | 0.12 ± 0.08  | 0.93 ± 0.33       | 2.47 ± 0.71      | 0.05 ± 0.05   | 0.72 ± 0.31       | 3.12 ± 0.70      | 0.47 ± 0.18  | 1.94 ± 1.63       | 1.53 ± 0.66      |
| Heptanal                       | 7.6            | 0.07 ± 0.07  | 0.67 ± 0.36       | 0.00 ± 0.00      | 0.00 ± 0.00   | 0.14 ± 0.14       | 0.00 ± 0.00      | 0.15 ± 0.15  | 0.29 ± 0.19       | 0.87 ± 0.34      |
| Benzaldehyde                   | 8.9            | 0.13 ± 0.11  | 2.51 ± 1.24       | 0.66 ± 0.27      | 0.07 ± 0.07   | 0.69 ± 0.35       | 1.90 ± 0.33      | 0.64 ± 0.64  | 0.46 ± 0.33       | 2.34 ± 0.82      |
| 2,4,6-trimethyl-pyridine       | 9.6            | 0.34 ± 0.34  | 0.81 ± 0.42       | 0.89 ± 0.52      | 0.02 ± 0.02   | 0.24 ± 0.16       | 1.09 ± 0.43      | 0.07 ± 0.07  | 0.42 ± 0.29       | 2.74 ± 1.65      |
| Octanal                        | 9.9            | 0.78 ± 0.32  | 2.29 ± 0.69       | 0.73 ± 0.26      | 0.33 ± 0.18   | 1.08 ± 0.41       | 0.70 ± 0.23      | 0.77 ± 0.39  | 1.23 ± 0.40       | 1.83 ± 0.55      |
| Z-3-hexenyl acetate            | 10.0           | 0.28 ± 0.15  | 10.51 ± 3.87      | 28.00 ± 7.49     | 3.85 ± 2.55   | 16.11 ± 5.10      | 48.11 ± 8.02     | 0.44 ± 0.22  | 8.97 ± 4.55       | 13.22 ± 3.49     |
| R-Limonene                     | 10.4           | 1.73 ± 0.57  | 9.12 ± 4.13       | 1.65 ± 0.31      | 2.19 ± 1.20   | 5.78 ± 2.92       | 4.84 ± 2.06      | 1.89 ± 0.86  | 1.07 ± 0.44       | 3.96 ± 1.85      |
| Cis-β-ocimene                  | 10.6           | 0.19 ± 0.13  | 2.19 ± 1.05       | 2.59 ± 0.39      | 0.07 ± 0.05   | 0.87 ± 0.18       | 2.07 ± 0.32      | 0.80 ± 0.63  | 0.82 ± 0.37       | 3.48 ± 0.97      |
| Unknown.1                      | 10.7           | 3.23 ± 1.02  | 7.31 ± 2.32       | 3.56 ± 1.49      | 0.77 ± 0.69   | 4.24 ± 0.99       | 4.92 ± 2.24      | 4.37 ± 1.29  | 4.26 ± 1.64       | 6.65 ± 2.30      |
| Trans-β-ocimene                | 10.8           | 0.29 ± 0.23  | 6.99 ± 2.16       | 94.40 ± 18.46    | 3.97 ± 1.94   | 39.09 ± 13.82     | 85.80 ± 13.92    | 0.17 ± 0.17  | 10.77 ± 4.42      | 85.62 ± 21.53    |
| Linalool                       | 11.9           | 0.00 ± 0.00  | 5.14 ± 1.09       | 53.65 ± 13.10    | 0.84 ± 0.84   | 11.00 ± 4.22      | 53.74 ± 11.52    | 0.39 ± 0.28  | 7.03 ± 4.10       | 44.57 ± 24.30    |
| Nonanal                        | 12.0           | 3.40 ± 0.73  | 8.88 ± 2.45       | 3.97 ± 0.42      | 2.33 ± 0.75   | 4.45 ± 0.80       | 4.21 ± 0.38      | 4.22 ± 1.19  | 4.70 ± 0.65       | 5.96 ± 1.51      |
| DMNT <sup>1</sup>              | 12.3           | 0.00 ± 0.00  | 3.75 ± 1.68       | 38.17 ± 12.11    | 3.67 ± 2.12   | 42.35 ± 18.55     | 87.15 ± 25.61    | 0.00 ± 0.00  | 21.97 ± 12.32     | 33.75 ± 11.62    |
| 2-(2-butoxyethoxy)-ethanol     | 13.9           | 0.32 ± 0.22  | 17.34 ± 10.58     | 0.32 ± 0.22      | 5.26 ± 3.95   | 29.41 ± 24.72     | 11.80 ± 8.42     | 0.00 ± 0.00  | 0.00 ± 0.00       | 3.82 ± 3.43      |
| Methyl salicylate              | 14.1           | 0.51 ± 0.34  | 4.74 ± 1.54       | 1.20 ± 0.49      | 0.97 ± 0.39   | 13.91 ± 6.20      | 7.86 ± 3.11      | 0.65 ± 0.44  | 2.84 ± 1.34       | 3.08 ± 1.30      |
| Decanal                        | 14.3           | 5.48 ± 1.55  | 10.91 ± 2.64      | 3.67 ± 0.42      | 3.46 ± 1.31   | 7.27 ± 1.40       | 4.83 ± 0.78      | 5.77 ± 1.70  | 7.00 ± 1.23       | 8.46 ± 2.96      |
| Cis-3-hexenyl isovalerate      | 14.9           | 0.22 ± 0.22  | 0.92 ± 0.47       | 3.43 ± 1.13      | 0.40 ± 0.26   | 2.04 ± 1.37       | 3.88 ± 0.64      | 0.20 ± 0.20  | 1.36 ± 0.85       | 2.20 ± 0.71      |
| Indole                         | 16.4           | 2.48 ± 1.48  | 15.03 ± 4.40      | 12.86 ± 4.01     | 1.35 ± 0.70   | 15.54 ± 6.30      | 21.69 ± 5.66     | 1.46 ± 0.68  | 8.70 ± 3.30       | 10.39 ± 2.51     |
| Unknown3                       | 18.4           | 0.00 ± 0.00  | 2.49 ± 1.57       | 0.80 ± 0.60      | 0.00 ± 0.00   | 0.67 ± 0.36       | 1.31 ± 0.87      | 0.00 ± 0.00  | 1.00 ± 0.69       | 0.00 ± 0.00      |
| Cis-jasmone                    | 18.9           | 0.17 ± 0.12  | 3.14 ± 1.17       | 3.13 ± 0.90      | 0.35 ± 0.27   | 1.66 ± 1.06       | 5.77 ± 2.15      | 0.10 ± 0.10  | 0.44 ± 0.31       | 2.18 ± 0.63      |
| Trans-caryophyllene            | 19.4           | 0.22 ± 0.11  | 2.57 ± 1.51       | 5.52 ± 1.79      | 0.09 ± 0.06   | 1.15 ± 0.53       | 4.28 ± 1.31      | 0.00 ± 0.00  | 1.15 ± 0.76       | 1.46 ± 0.66      |
| Unknown2                       | 21.2           | 0.80 ± 0.11  | 1.37 ± 0.36       | 0.92 ± 0.21      | 0.50 ± 0.14   | 0.83 ± 0.08       | 1.24 ± 0.23      | 0.67 ± 0.03  | 0.91 ± 0.08       | 0.87 ± 0.10      |
| α-Farnesene                    | 21.4           | 0.00 ± 0.00  | 0.72 ± 0.28       | 4.50 ± 2.32      | 0.07 ± 0.07   | 0.09 ± 0.06       | 0.85 ± 0.47      | 0.00 ± 0.00  | 0.18 ± 0.09       | 2.10 ± 1.25      |
| Unknown4                       | 22.1           | 0.41 ± 0.14  | 1.05 ± 0.31       | 0.58 ± 0.18      | 0.33 ± 0.14   | 1.26 ± 0.66       | 1.14 ± 0.21      | 1.06 ± 0.22  | 0.68 ± 0.19       | 1.05 ± 0.30      |
| Trans-nerolidol                | 22.7           | 0.00 ± 0.00  | 2.07 ± 1.25       | 2.56 ± 0.46      | 0.08 ± 0.08   | 1.02 ± 0.37       | 3.89 ± 0.50      | 0.00 ± 0.00  | 0.59 ± 0.30       | 1.42 ± 0.47      |
| TMTT <sup>2</sup>              | 23.0           | 0.05 ± 0.05  | 1.17 ± 0.40       | 8.05 ± 2.31      | 0.74 ± 0.50   | 6.30 ± 2.02       | 14.02 ± 4.11     | 0.15 ± 0.10  | 3.40 ± 1.72       | 6.04 ± 1.85      |
| TOTAL                          | 100.0          | 26.47 ± 5.80 | 141.48 ± 29.55    | 296.48 ± 31.91   | 35.19 ± 12.02 | 217.89 ± 52.78    | 413.53 ± 50.26   | 31.39 ± 4.87 | 114.35 ± 39.94    | 268.57 ± 53.38   |

<sup>1</sup> (E)-4,8-dimethyl-1,3,7-nonatriene

<sup>2</sup> (E, E)-4,8,12-trimethyl-1,3,12-trimethyl-1,3,7,11-tridecatetraene

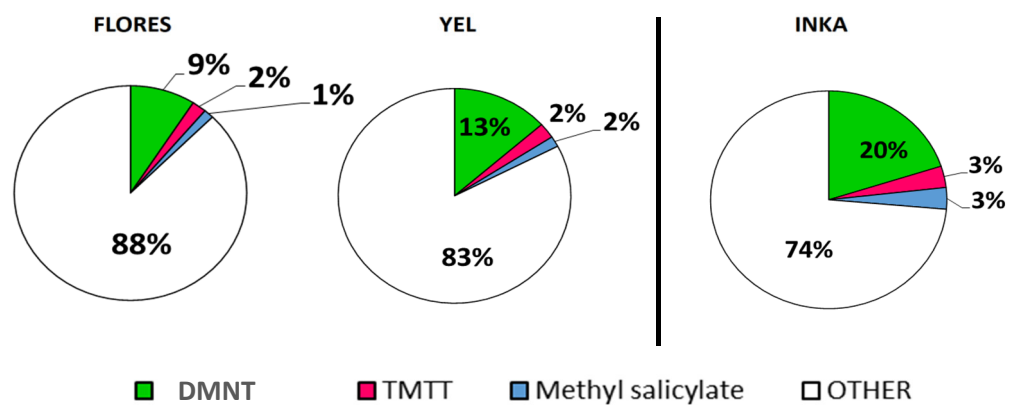

Figure S1. Significant variation in the relative proportions of constitutively expressed volatile organic compounds from damaged *P. lunatus* plants. DMNT and TMTT represent (E)-4,8-dimethyl-1,3,7-nonatriene, (E, E)-4,8,12-trimethyl-1,3,12-trimethyl-1,3,7,11-tridecatetraene, respectively.
